# Supplementary material for: High-Density Lipoprotein Changes in Alzheimer’s Disease Are APOE Genotype-Specific
Source: MDPI journal article supplement (doi:10.3390/biomedicines10071495), 2022-06-24
Supplement: s1 [file s1]

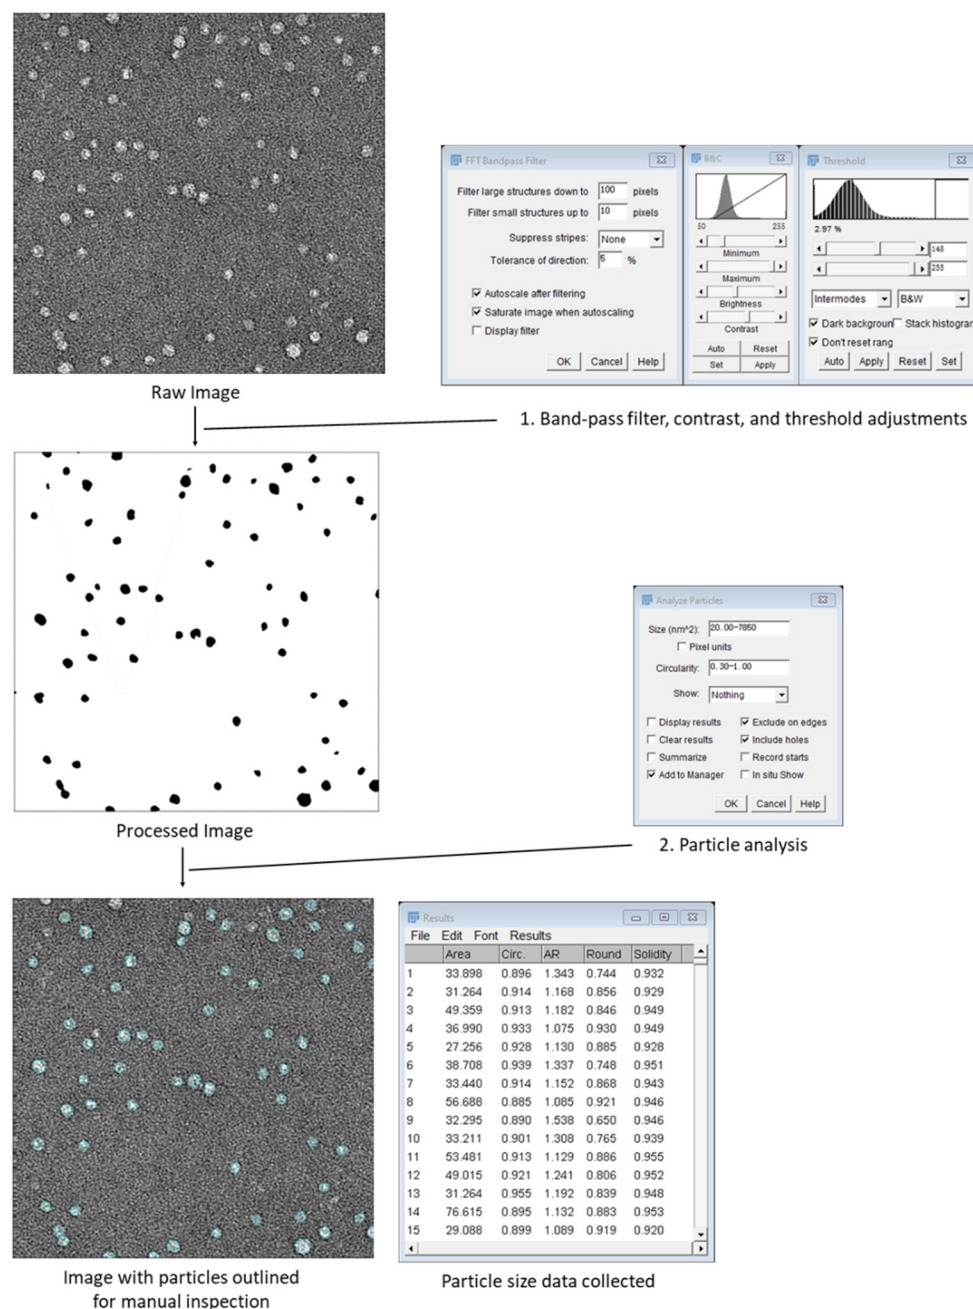

**Figure S1.** Schematic working flow for particle selection and size analysis on the sample TEM images. The “Bandpass Filter” function was called using the following parameters: “filter large = 100, filter small = 10, suppress = None, tolerance = 5, and autoscale saturate” parameters. The contrast of the cleaned micrograph was set to “min = 50, max = 205”. The threshold of the micrographs was set using the “Intermodes dark” option. Particle analysis function was used with the following parameters: “size = 20–7850, circularity = 0.30–1.00, display, exclude, include, and add”. Particles that were captured were then outlined onto the original TEM micrograph and were checked manually for accuracy.

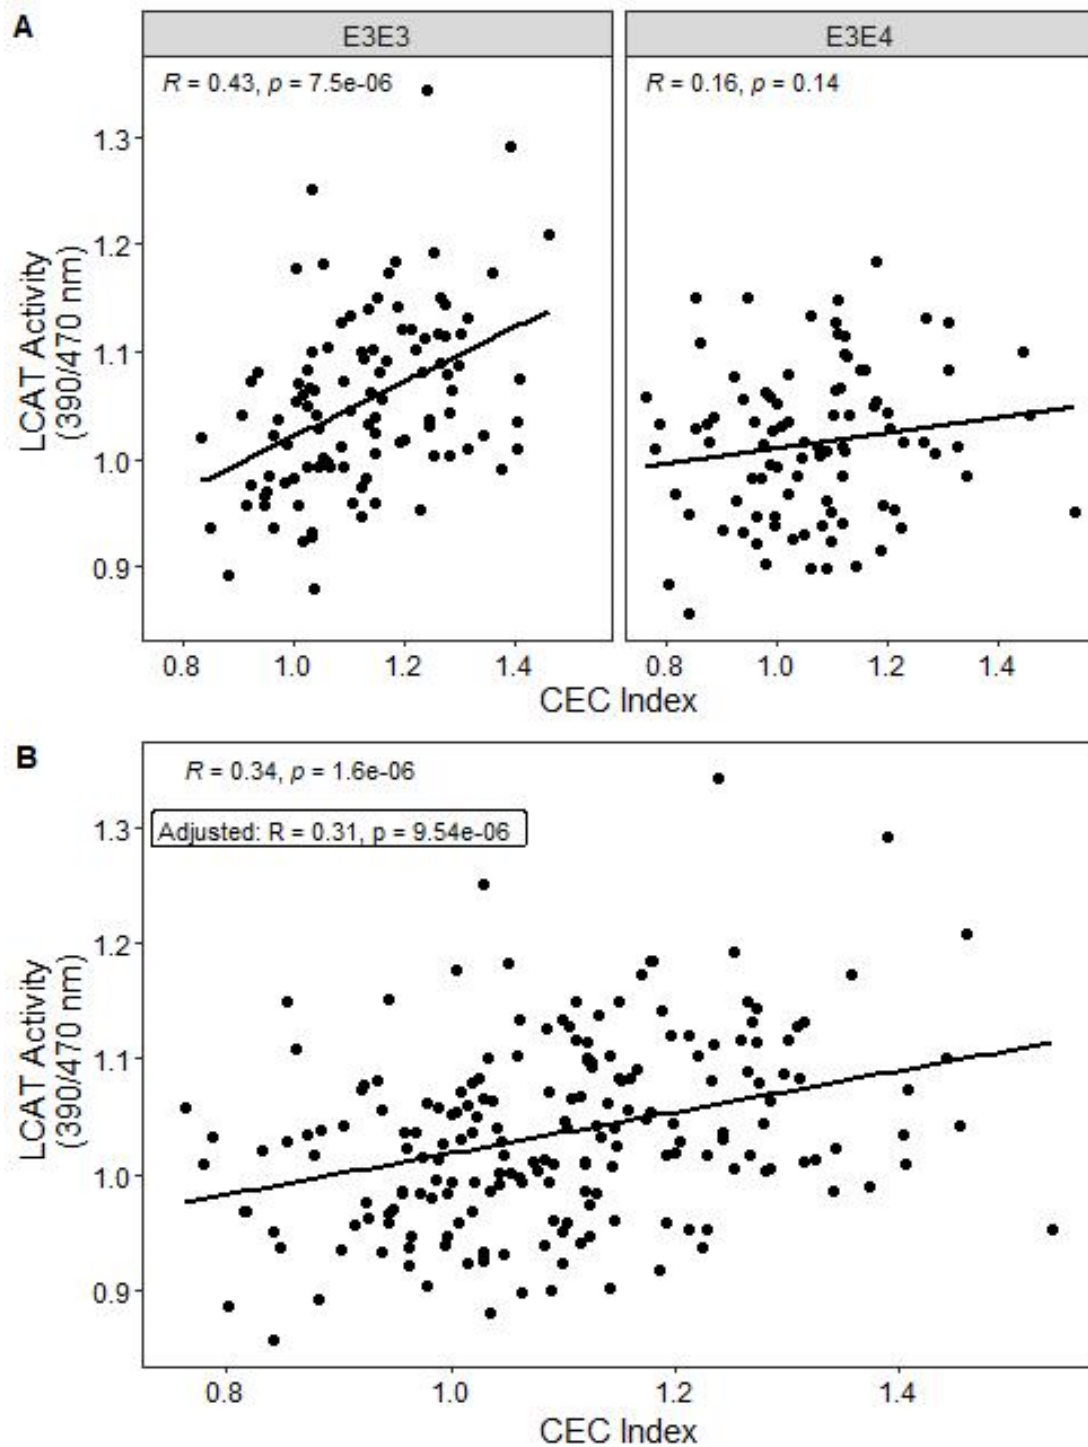

**Figure S2.** Spearman's correlation between HDL CEC and LCAT activity. **(A)** HDL LCAT activity and CEC index by the *APOE* genotype. **(B)** Spearman's correlation adjusting for the *APOE* genotype between the HDL LCAT activity and CEC index. CEC = cholesterol efflux capacity, HDL = high-density lipoproteins; LCAT= lecithin cholesterol acyltransferase.
